# Supplementary material
Source: publisher site journal article supplement (https://www.dovepress.com/article/499808)
Supplement: Supplementary file 1 [file get_supplementary_file.php]

Supplementary Table 1. Inflammatory and Coagulation Marker Correlations

| **Inflammatory Marker** | **Coagulation Indicator** | **Spearman Correlation** | ***P*-Value** |
| --- | --- | --- | --- |
| Neutrophil_Count | PT | -0.03 | 0.74 |
| Neutrophil_Count | aPTT | -0.03 | 0.74 |
| Neutrophil_Count | INR | 0.98 | 0.00 |
| CRP | PT | 0.98 | 0.00 |
| CRP | aPTT | -0.15 | 0.13 |
| CRP | INR | -0.01 | 0.94 |
| NLR | PT | -0.14 | 0.15 |
| NLR | aPTT | 0.99 | 0.00 |
| NLR | INR | -0.02 | 0.85 |
| PLR | PT | 0.01 | 0.90 |
| PLR | aPTT | -0.20 | 0.04 |
| PLR | INR | -0.19 | 0.06 |

Abbreviations: aPTT, Activated Partial Thromboplastin Time; CRP, C-reactive Protein; INR, International Normalized Ratio; NLR, Neutrophil-to-Lymphocyte Ratio; PLR, Platelet-to-Lymphocyte Ratio; PT, Prothrombin Time.
